# Supplementary material
Source: publisher figshare collection journal article supplement (https://tandf.figshare.com/ndownloader/files/14037530)
Supplement: Supplementary file 1 [file 14037530]

**Antioxidant and antibacterial activities of modified crab shell bioactive peptides by Maillard reaction**

**Wei Jianga, Yu Liua,*, Xianqing Yangb,*, Shiwei Hua**

a Institute of Innovation & Application, Zhejiang Ocean University, Zhoushan 316022, China

b Key Laboratory of Aquatic Product Processing, Ministry of Agriculture, Guangzhou 510300,China

*Corresponding authors: Yu Liu, Xianqing Yang

Tel: +580-2262589

Fax: +580-2262589

E-mail address: liuyu_zjou@163.com (Yu Liu), yxqgd@163.com (Xianqing Yang)

(Running title: Bioactivity of Maillard reaction modified peptide)

**Supplementary Data**

**Supplementary Figure S1.** A schematic overview of the experimental study.

**Supplementary Figure S2.** A typical HPLC chromatogram for the molecular weight distribution of the MRPs (A) and calibration curve (B). Size exclusion chromatograms using a TSKgel G2000SWXL column at a flow rate of 1.0 mL/min of pH 7.2 sodium phosphate buffer (0.02 M) containing 0.25 M NaCl. Molecular weight distributions were calculated according to the calibration curve. MRPs: Maillard reaction products.
